# Supplementary material
Source: PubMed Central journal article supplement (PMC2409234)
Supplement: pnas_0709257105_5.pdf [file pnas_0709257105_5.pdf]

**A**

Upf1p-TAP associated (781)  
This study

Direct NMD substrates (279)  
Guan et al. 2006

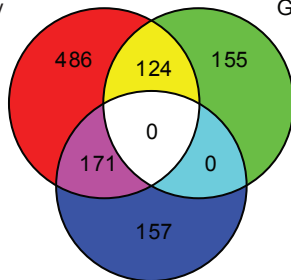

Indirect NMD substrates (328)  
Guan et al. 2006

**B**

Direct NMD substrates (404)  
This study

Direct NMD substrates (279)  
Guan et al. 2006

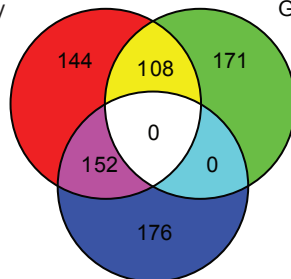

Indirect NMD substrates (328)  
Guan et al. 2006
