# Supplementary material
Source: PubMed Central journal article supplement (PMC2409234)

A

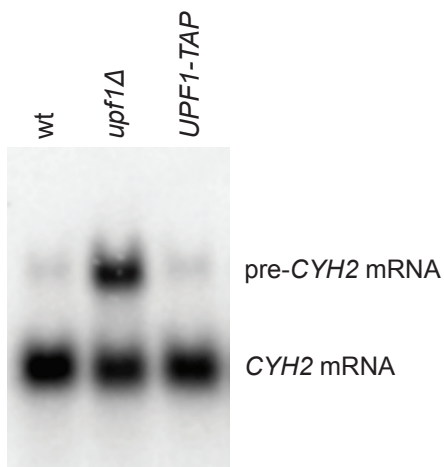

B

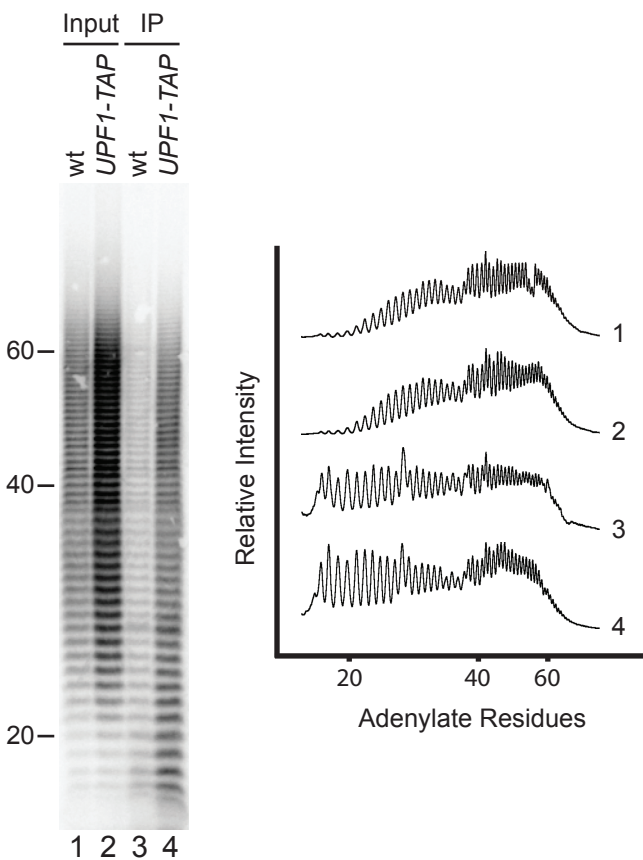

Supplement: pnas_0709257105_1.pdf [file pnas_0709257105_1.pdf]

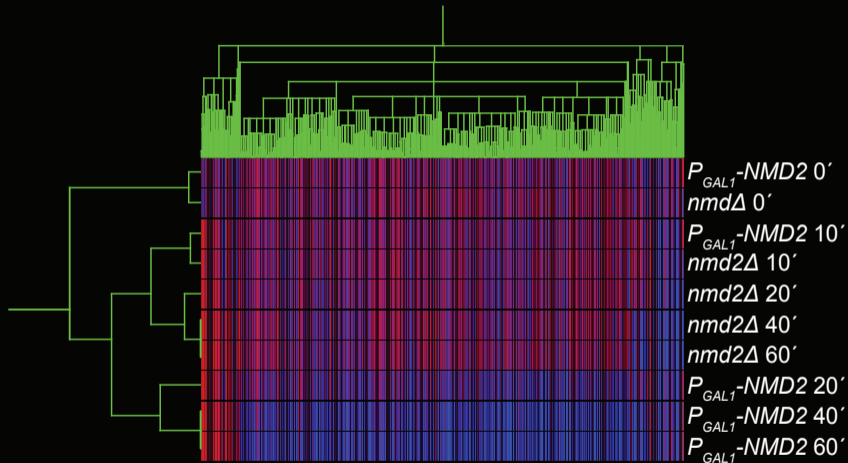

Fold change ≤ 0.25 0.50 1.0 2.00 ≥ 4.00

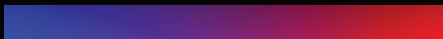

Supplement: pnas_0709257105_2.pdf [file pnas_0709257105_2.pdf]

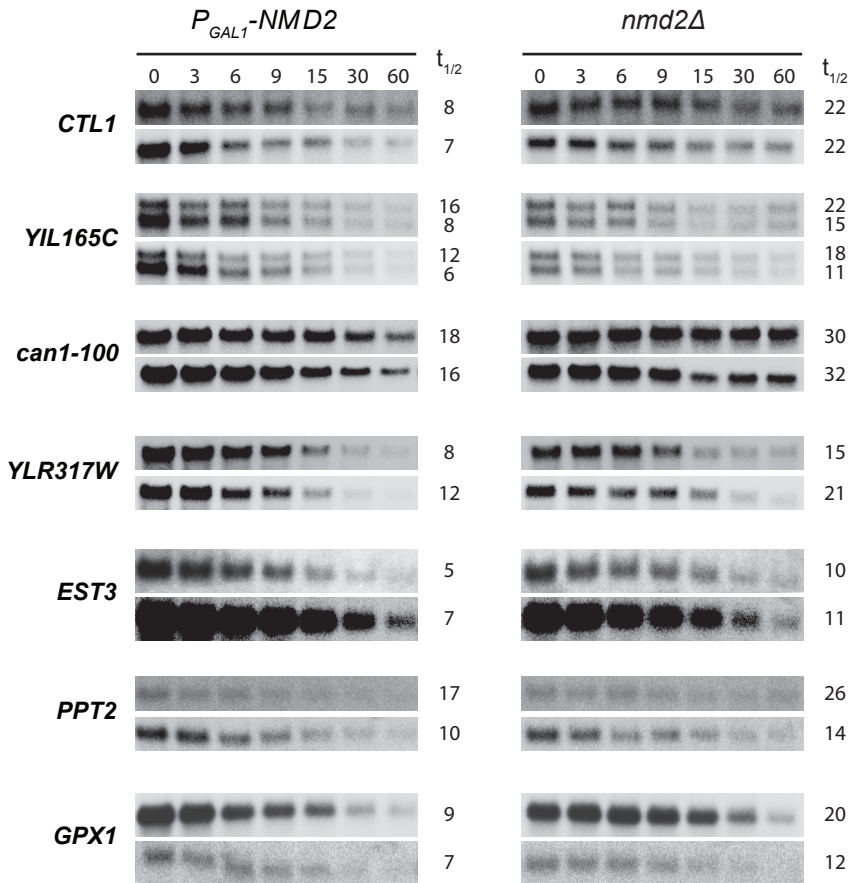

Supplement: pnas_0709257105_3.pdf [file pnas_0709257105_3.pdf]

A

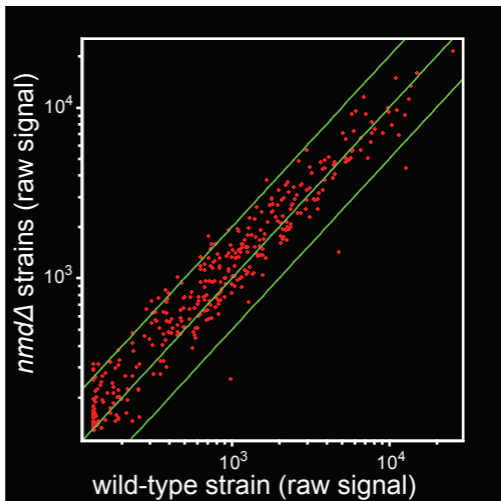

B

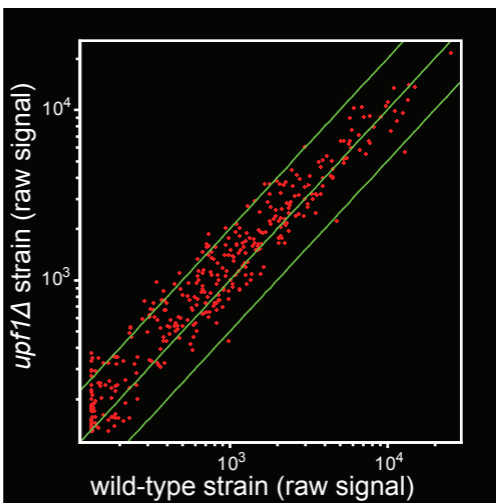

Supplement: pnas_0709257105_4.pdf [file pnas_0709257105_4.pdf]
